# Supplementary material for: Improving the Integration between Palliative Radiotherapy and Supportive Care: A Narrative Review
Source: MDPI journal article supplement (doi:10.3390/curroncol29100627), 2022-10-19
Supplement: s1 [file s1]

Supplementals

# Improving the Integration between Palliative Radiotherapy and Supportive Care: A Narrative Review

Erica Scirocco <sup>1,2,\*</sup>, Francesco Cellini <sup>3,4</sup>, Costanza Maria Donati <sup>1,2</sup>, Jenny Capuccini <sup>5</sup>, Romina Rossi <sup>6</sup>, Milly Buwenge <sup>2</sup>, Luigi Montanari <sup>5</sup>, Marco Maltoni <sup>2,6,7</sup> and Alessio Giuseppe Morganti <sup>1,2</sup>

**Table S1.** narrative review checklist.

| Section/topic          | # | Checklist item                                                                                                                                                                                        | Reported on page or line # |
|------------------------|---|-------------------------------------------------------------------------------------------------------------------------------------------------------------------------------------------------------|----------------------------|
| <b>TITLE</b>           |   |                                                                                                                                                                                                       |                            |
| Title                  | 1 | Identify the report as a Narrative Review                                                                                                                                                             | 1                          |
| <b>ABSTRACT</b>        |   |                                                                                                                                                                                                       |                            |
| Unstructured summary   | 2 | Provide an unstructured summary including, as applicable: background. Objective, brief summary of narrative review and implications for future research, and clinical practice or policy development. | 1                          |
| <b>INTRODUCTION</b>    |   |                                                                                                                                                                                                       |                            |
| Rationale/background   | 3 | Describe the rationale for the review in the context of what is already known                                                                                                                         | 2                          |
| Objectives             | 4 | Specify the key question(s) for the review topic                                                                                                                                                      | 2                          |
| <b>METHODS</b>         |   |                                                                                                                                                                                                       |                            |
| Research selection     | 5 | Specify the process for identifying the literature search (e.g., years considered, language, publication status, study design, and databases of coverage)                                             | 2                          |
| <b>RESULTS/SUMMARY</b> |   |                                                                                                                                                                                                       |                            |
| Narrative              | 6 | Discuss: 1) research reviewed including fundamental or key findings, 2) limitations and/or quality of research reviewed, and 3) need for future research.                                             | 2-10                       |
| Summary                | 7 | Provide and overall interpretation of the narrative review in the context of clinical practice for health professionals, policy development and implementation, or future research.                   | 10                         |
